# Supplementary material for: Palladium-catalysed carboformylation of alkynes using acid chlorides as a dual carbon monoxide and carbon source
Source: Springer Nature journal article supplement (doi:10.1038/s41557-020-00621-x), 2021-01-29
Supplement: 41557_2020_621_MOESM194_ESM.mol [file 41557_2020_621_MOESM194_ESM.mol]

nchem.20051178B-compL08.mol
  ChemDraw11272013432D

 47 55  0  0  0  0  0  0  0  0999 V2000
    0.0648    1.4488    0.0000 C   0  0  0  0  0  0  0  0  0  0  0  0
   -0.1034    0.6562    0.0000 C   0  0  0  0  0  0  0  0  0  0  0  0
   -0.5370    1.9918    0.0000 C   0  0  0  0  0  0  0  0  0  0  0  0
   -1.3086    1.7407    0.0000 C   0  0  0  0  0  0  0  0  0  0  0  0
   -1.4768    0.9480    0.0000 C   0  0  0  0  0  0  0  0  0  0  0  0
   -0.8749    0.4058    0.0000 C   0  0  0  0  0  0  0  0  0  0  0  0
   -1.9112    2.2837    0.0000 C   0  0  0  0  0  0  0  0  0  0  0  0
   -2.6820    2.0326    0.0000 C   0  0  0  0  0  0  0  0  0  0  0  0
   -2.8509    1.2399    0.0000 C   0  0  0  0  0  0  0  0  0  0  0  0
   -2.2483    0.6976    0.0000 C   0  0  0  0  0  0  0  0  0  0  0  0
    0.3733   -0.0000    0.0000 O   0  0  0  0  0  0  0  0  0  0  0  0
   -0.8749   -0.4050    0.0000 C   0  0  0  0  0  0  0  0  0  0  0  0
   -1.4768   -0.9480    0.0000 C   0  0  0  0  0  0  0  0  0  0  0  0
   -1.3086   -1.7407    0.0000 C   0  0  0  0  0  0  0  0  0  0  0  0
   -0.5370   -1.9918    0.0000 C   0  0  0  0  0  0  0  0  0  0  0  0
    0.0648   -1.4488    0.0000 C   0  0  0  0  0  0  0  0  0  0  0  0
   -0.1034   -0.6562    0.0000 C   0  0  0  0  0  0  0  0  0  0  0  0
   -2.2483   -0.6976    0.0000 C   0  0  0  0  0  0  0  0  0  0  0  0
   -2.8509   -1.2399    0.0000 C   0  0  0  0  0  0  0  0  0  0  0  0
   -2.6820   -2.0326    0.0000 C   0  0  0  0  0  0  0  0  0  0  0  0
   -1.9112   -2.2837    0.0000 C   0  0  0  0  0  0  0  0  0  0  0  0
    0.8401    1.7007    0.0000 P   0  0  0  0  0  0  0  0  0  0  0  0
    1.4532    1.1487    0.0000 C   0  0  0  0  0  0  0  0  0  0  0  0
    1.2817    0.3417    0.0000 C   0  0  0  0  0  0  0  0  0  0  0  0
    1.8948   -0.2103    0.0000 C   0  0  0  0  0  0  0  0  0  0  0  0
    2.6794    0.0446    0.0000 C   0  0  0  0  0  0  0  0  0  0  0  0
    2.8509    0.8516    0.0000 C   0  0  0  0  0  0  0  0  0  0  0  0
    2.2378    1.4036    0.0000 C   0  0  0  0  0  0  0  0  0  0  0  0
    1.0117    2.5077    0.0000 C   0  0  0  0  0  0  0  0  0  0  0  0
    1.7963    2.7626    0.0000 C   0  0  0  0  0  0  0  0  0  0  0  0
    1.9678    3.5696    0.0000 C   0  0  0  0  0  0  0  0  0  0  0  0
    1.3547    4.1216    0.0000 C   0  0  0  0  0  0  0  0  0  0  0  0
    0.5701    3.8667    0.0000 C   0  0  0  0  0  0  0  0  0  0  0  0
    0.3986    3.0597    0.0000 C   0  0  0  0  0  0  0  0  0  0  0  0
    0.8401   -1.7007    0.0000 P   0  0  0  0  0  0  0  0  0  0  0  0
    1.0117   -2.5077    0.0000 C   0  0  0  0  0  0  0  0  0  0  0  0
    0.3986   -3.0597    0.0000 C   0  0  0  0  0  0  0  0  0  0  0  0
    0.5701   -3.8667    0.0000 C   0  0  0  0  0  0  0  0  0  0  0  0
    1.3547   -4.1216    0.0000 C   0  0  0  0  0  0  0  0  0  0  0  0
    1.9678   -3.5696    0.0000 C   0  0  0  0  0  0  0  0  0  0  0  0
    1.7963   -2.7626    0.0000 C   0  0  0  0  0  0  0  0  0  0  0  0
    1.4532   -1.1487    0.0000 C   0  0  0  0  0  0  0  0  0  0  0  0
    2.2378   -1.4036    0.0000 C   0  0  0  0  0  0  0  0  0  0  0  0
    2.8509   -0.8516    0.0000 C   0  0  0  0  0  0  0  0  0  0  0  0
    2.6794   -0.0446    0.0000 C   0  0  0  0  0  0  0  0  0  0  0  0
    1.8948    0.2103    0.0000 C   0  0  0  0  0  0  0  0  0  0  0  0
    1.2817   -0.3417    0.0000 C   0  0  0  0  0  0  0  0  0  0  0  0
 33 34  2  0      
 32 33  1  0      
 31 32  2  0      
 30 31  1  0      
 29 30  2  0      
 29 34  1  0      
 27 28  2  0      
 26 27  1  0      
 25 26  2  0      
 24 25  1  0      
 23 24  2  0      
 23 28  1  0      
 22 23  1  0      
 22 29  1  0      
  1 22  1  0      
 46 47  2  0      
 45 46  1  0      
 44 45  2  0      
 43 44  1  0      
 42 43  2  0      
 42 47  1  0      
 40 41  2  0      
 39 40  1  0      
 38 39  2  0      
 37 38  1  0      
 36 37  2  0      
 36 41  1  0      
 35 36  1  0      
 35 42  1  0      
 16 35  1  0      
  1  2  2  0      
  1  3  1  0      
  3  4  2  0      
  4  5  1  0      
  5  6  2  0      
  6  2  1  0      
  4  7  1  0      
  7  8  2  0      
  8  9  1  0      
  9 10  2  0      
 10  5  1  0      
  2 11  1  0      
  6 12  1  0      
 12 13  2  0      
 13 14  1  0      
 14 15  2  0      
 15 16  1  0      
 16 17  2  0      
 17 12  1  0      
 13 18  1  0      
 18 19  2  0      
 19 20  1  0      
 20 21  2  0      
 21 14  1  0      
 11 17  1  0      
M  STY  1   1 SUP
M  SLB  1   1   1
M  SAL   1 13  22  23  24  25  26  27  28  29  30  31  32  33  34
M  SBL   1  1  15
M  SMT   1 PPh2
M  SBV   1  15   -0.7753   -0.2519
M  STY  1   2 SUP
M  SLB  1   2   2
M  SAL   2 13  35  36  37  38  39  40  41  42  43  44  45  46  47
M  SBL   2  1  30
M  SMT   2 PPh2
M  SBV   2  30   -0.7753    0.2519
M  END
